# Supplementary material
Source: PubMed Central journal article supplement (PMC3457232)
Supplement: JB.00674-12_zjb999091959so1.pdf [file JB.00674-12_zjb999091959so1.pdf]

**SUPPLEMENTARY MATERIAL**

**Table S1**  
**Strains used in this study**

| <b>Strain</b>              | <i>recAo</i> | <i>radA</i> | <i>recX</i> | <b>Other relevant genotype</b>                                      | <b>Source or derivation</b>   |
|----------------------------|--------------|-------------|-------------|---------------------------------------------------------------------|-------------------------------|
| <b>CAG18642</b>            | +            | +           | +           | <i>zff-3131::Tn10</i>                                               | <i>E. coli</i> Stock Center   |
| <b>GJ1989</b>              | +            | +           | +           | <i>malE::Tn10-9 lexA3</i>                                           | (11)                          |
| <b>JC13509<sup>a</sup></b> | +            | +           | +           |                                                                     |                               |
| <b>N3030</b>               | +            | +           | +           | <i>gal-76::Tn10</i>                                                 | From R.G.Lloyd                |
| <b>SS775</b>               | +            | +           | +           | <i>malE::Tn10-9 lexA3</i>                                           | GJ1989→JC13509 <sup>j</sup>   |
| <b>SS996<sup>b</sup></b>   | +            | +           | +           | $\Omega_{gfp}$                                                      | (8)                           |
| <b>SS1153</b>              | +            | +           | +           |                                                                     | pKD46→JC13509 <sup>f</sup>    |
| <b>SS1465</b>              | +            | +           | +           | <i>gal-76::Tn10</i>                                                 | N3030→SS996 <sup>i</sup>      |
| <b>SS2642</b>              | 1403         | +           | <i>del</i>  | <i>ygaD1::kan recA4136,4155::gfp-901</i>                            | (10)                          |
| <b>SS2647</b>              | 1403         | +           | <i>del</i>  | <i>ygaD1::kan recA4136,4155::gfp-901</i>                            | SS2642→JC13509 <sup>h</sup>   |
| <b>SS3047</b>              | 1403         | +           | +           | <i>ygaD1::kan recA4136,4155::gfp-901</i>                            | (10)                          |
| <b>SS3085</b>              | 1403         | +           | +           | <i>ygaD1::kan recA4136,4155::gfp-901</i>                            | (9) <sup>h</sup>              |
| <b>SS3306</b>              | 1403         | +           | +           | <i>zff-3131::Tn10 ygaD1::kan recA4136,4155::gfp-901</i>             | CAG18642→SS33085 <sup>i</sup> |
| <b>SS4074</b>              | +            | +           | +           | <i>del(xthA)100::kan</i>                                            | (1)                           |
| <b>SS4279</b>              | +            | <i>kan</i>  | +           |                                                                     | (1)                           |
| <b>SS4414</b>              | +            | +           | +           | <i>malE::Tn10-9 lexA3</i>                                           | pKD46→SS775 <sup>f</sup>      |
| <b>SS4520</b>              | +            | +           | +           | <i>del(xthA)100::kan</i>                                            | SS4074→JC13509 <sup>h</sup>   |
| <b>SS4555</b>              | +            | +           | +           | <i>del(xthA)200::frit</i>                                           | This work <sup>k</sup>        |
| <b>SS4560</b>              | 1403         | +           | +           | <i>ygaD1::kan recA4136,4155::gfp-901 del(xthA)200::frit</i>         | SS3047→SS4555 <sup>h</sup>    |
| <b>SS4857</b>              | +            | +           | +           | <i>del(xthA)200::frit gal-76::Tn10 <math>\Omega_{gfp}</math></i>    | SS1465→SS4555 <sup>i</sup>    |
| <b>SS4989</b>              | +            | +           | +           | <i>del(xthA)100::kan</i>                                            | pKD46→SS4520 <sup>f</sup>     |
| <b>SS4959</b>              | +            | +           | <i>cat</i>  |                                                                     | This work <sup>d</sup>        |
| <b>SS4999</b>              | +            | +           | +           | <i>del(xthA)100::cat</i>                                            | This work <sup>g</sup>        |
| <b>SS5841</b>              | 1403         | <i>del</i>  | <i>cat</i>  | $\Omega_{gfp}$                                                      | SS6186→SS7102 <sup>j</sup>    |
| <b>SS6013</b>              | +            | +           | +           | <i>ygaD1::kan recA4142 <math>\Omega_{gfp}</math></i>                | (7)                           |
| <b>SS6080</b>              | +            | +           | <i>cat</i>  | $\Omega_{gfp}$                                                      | (7) <sup>j</sup>              |
| <b>SS6087</b>              | 1403         | +           | +           | <i>ygaD1::kan <math>\Omega_{gfp}</math></i>                         | This work <sup>e</sup>        |
| <b>SS6088</b>              | 1403         | +           | +           | <i>ygaD1::kan <math>\Omega_{gfp}</math></i>                         | SS6087→SS996 <sup>h</sup>     |
| <b>SS6156</b>              | 1403         | +           | +           | <i>ygaD1::kan recA4142 zff-3131::Tn10 <math>\Omega_{gfp}</math></i> | (6)                           |
| <b>SS6186</b>              | 1403         | +           | <i>cat</i>  | <i>ygaD1::kan <math>\Omega_{gfp}</math></i>                         | This work <sup>d</sup>        |
| <b>SS7102</b>              | +            | <i>del</i>  | +           | $\Omega_{gfp}$                                                      | This work <sup>k</sup>        |
| <b>SS7108</b>              | +            | <i>del</i>  | +           | <i>del(xthA)100::kan <math>\Omega_{gfp}</math></i>                  | SS4074→SS7102 <sup>h</sup>    |
| <b>SS7118</b>              | +            | <i>del</i>  | +           | <i>del(xthA)200::frit <math>\Omega_{gfp}</math></i>                 | This work <sup>k</sup>        |
| <b>SS7128</b>              | 1403         | <i>del</i>  | +           | <i>del(xthA)200::frit <math>\Omega_{gfp}</math></i>                 | SS6087→SS7118 <sup>h</sup>    |
| <b>SS7129</b>              | 1403         | <i>del</i>  | <i>cat</i>  | <i>del(xthA)200::frit <math>\Omega_{gfp}</math></i>                 | SS6186→SS7118 <sup>h</sup>    |
| <b>SS7132</b>              | +            | <i>del</i>  | <i>cat</i>  | <i>del(xthA)200::frit <math>\Omega_{gfp}</math></i>                 | SS4959→SS7118 <sup>j</sup>    |
| <b>SS7136</b>              | 1403         | <i>del</i>  | +           | $\Omega_{gfp}$                                                      | SS6087→SS7102 <sup>h</sup>    |
| <b>SS7152</b>              | +            | <i>del</i>  | <i>cat</i>  | $\Omega_{gfp}$                                                      | SS4959→SS7102 <sup>j</sup>    |
| <b>SS7155</b>              | 1403         | +           | <i>cat</i>  | $\Omega_{gfp}$                                                      | SS6186→SS996 <sup>h</sup>     |
| <b>SS7261</b>              | +            | <i>del</i>  | +           | <i>recA4136,4155::gfp-901 zff3131::Tn10</i>                         | SS3306→SS7255 <sup>i</sup>    |
| <b>SS8245</b>              |              | <i>op</i>   |             | <i>srlC300::Tn10 recA730 sulB103 <math>\Omega_{gfp}</math></i>      | This work <sup>l</sup>        |
| <b>SS8253</b>              | +            | <i>op</i>   | +           | $\Omega_{gfp}$                                                      | SS8245→SS996 <sup>j</sup>     |
| <b>SS8254</b>              | +            | <i>op</i>   | +           | <i>ygaD1::kan recA4142 <math>\Omega_{gfp}</math></i>                | SS8245→SS6013 <sup>j</sup>    |

|               |      |            |            |                                                            |                            |
|---------------|------|------------|------------|------------------------------------------------------------|----------------------------|
| <b>SS8272</b> | 1403 | <i>op</i>  | +          | <i>zjj-3131::Tn10 ygaD1::kan recA4142</i>                  | SS6156→SS8253 <sup>j</sup> |
| <b>SS9023</b> | +    | +          | +          | <i>ygaD1::kan recA4142 Ωgfp</i>                            | SS6013→SS996 <sup>h</sup>  |
| <b>SS9024</b> | +    | <i>del</i> | +          | <i>ygaD1::kan recA4142 Ωgfp</i>                            | SS6013→SS7102 <sup>h</sup> |
| <b>SS9040</b> | 1403 | +          | +          | <i>ygaD1::kan del(xthA)200::frt gal-76::Tn10 Ωgfp</i>      | SS6088→SS4857 <sup>h</sup> |
| <b>SS9041</b> | +    | +          | <i>cat</i> | <i>del(xthA)200::frt gal-76::Tn10 Ωgfp</i>                 | SS6080→SS4857 <sup>j</sup> |
| <b>SS9043</b> | 1403 | <i>del</i> | <i>del</i> | <i>ygaD1::kan recA4136,4155::gfp-901</i>                   | SS2647→SS7255 <sup>h</sup> |
| <b>SS9045</b> | 1403 | +          | <i>cat</i> | <i>del(xthA)200::frt gal-76::Tn10 Ωgfp</i>                 | SS6186→SS4857 <sup>j</sup> |
| <b>SS9048</b> | 1403 | <i>del</i> | <i>del</i> | <i>ygaD1::kan recA4136,4155::gfp-901 del(xthA)100::cat</i> | SS4999→SS9043 <sup>j</sup> |

<sup>a</sup> The genotype for this strain is *sulB103Δattλ::sulApΩgfp-mut2 lacMS286 φ80dIIIacBK1 argE3 hi-4 thi-1 xyl-5 mtl-1 rpsL31 tsx*. The *lacMS286φ80dIIIacBK1* code for two partial non-overlapping deletions of the *lac* operon (5, 15).

5 <sup>b</sup> This is JC13509 with *Δattλ::sulApΩgfp-mut2*. This is the *sulAp-gfp* reporter gene inserted into the *attλ* site (8).

<sup>c</sup> This is SS1153 with *ygaD1::kan recA4136,4155::gfp-901* at the native *recA* locus (9).

<sup>d</sup> PCR using prSJS748 and prSJS749 and pACYC184 as template. The linear DNA fragment was then used to transform recombinationally competent bacteria SS1153. *Cat*<sup>R</sup> was selected.

10 <sup>e</sup> Restrict pSJS1483 (7) with *Bam*HI and *Rsr*II and the linear DNA fragment was then used to transform recombinationally competent bacteria. *Kan*<sup>R</sup> was selected.

<sup>f</sup> Select *Amp*<sup>R</sup> at 30°C. pKD46 is described in (2).

<sup>g</sup> PCR using prSJS748 and prSJS749 and pACYC184 as template. The linear DNA fragment was then used to transform recombinationally competent bacteria SS4989. *Cat*<sup>R</sup> was selected, loss of *Kan*<sup>R</sup> screened.

<sup>h</sup> Select for *Kan*<sup>R</sup> and then screen for other marker phenotypically or by PCR.

15 <sup>i</sup> Select for *Tet*<sup>R</sup> and then screen for other marker phenotypically or by PCR.

<sup>j</sup> Select for *Cam*<sup>R</sup> and then screen for other marker phenotypically or by PCR.

<sup>k</sup> This deletion allele was created by first transducing the *Kan* resistant allele from the Kieo collection into the strain as indicated in the reference column. pLH29, carrying the *flp* gene, was then introduced and *Kan* sensitive derivatives were screened (3).

20 <sup>l</sup> This strain is in the AB1157 background.

**Table S2**  
**Oligonucleotides used for constructing the *radAop* mutation**

| Name          | 5' – 3' sequence                                                                                   | Purpose                                                                                       |
|---------------|----------------------------------------------------------------------------------------------------|-----------------------------------------------------------------------------------------------|
| prSJS<br>1049 | GTAGCGCGTACGGAAGTTCCTATTCTCTAGAAAGTA<br>TAGGAACTTCGGCGAAAATGAGACGTTGATC                            | Forward primer with<br>homology to cat gene on<br>pACYC184 and adds Flip site                 |
| prSJS<br>1050 | GTTACGCCGTACGGAAGTTCCTATACTTTCTAGAGA<br>ATAGGAACTTCTCAGGCGTAGCACCAGGCG                             | Reverse primer with homology<br>to cat gene on pACYC184 and<br>adds Flip site                 |
| prSJS<br>1119 | GCTACTCGACATCCTAGCTACTCAGGGAAGTTCCTAT<br>ACTTTCTAGAGAATAGGAACTTCTCAGGCGTAGCAC<br>CAGGCGTTTAAGG     | Reverse primer with Flip site<br>and adds an arbitrary sequence<br>and <i>recAp</i> sequences |
| prSJS<br>1137 | TAATACCGGATAGTCAATATGTTCTGTTGAAGCAATT<br>ATACTGCATGCTCATAACGGTATCAAGTGACTCGACA<br>TCCTAGCTACTCAGG  | First reverse primer PCR for<br><i>priCop</i> Cat <sup>R</sup> cassette                       |
| prSJS<br>1143 | CCTTCCAGTTTTTCCAGCAGCAGGGCGGTTTTTCATTT<br>TCTTCCTCCTTCATGCCGGTAATACCGGATAGTCAA<br>TATGTTCTGTTG     | Second reverse primer PCR<br>for <i>priCop</i> Cat <sup>R</sup> cassette                      |
| prSJS<br>1144 | CGAGCACTTAGCGTGGCGAACTGTGACACCGGGGCA<br>CAACGCTGACGCAGCGTAGCGAGCTGTCCTTCCAGT<br>TTTTCCAGCAGCAGG    | Third reverse primer PCR for<br><i>priCop</i> Cat <sup>R</sup> cassette                       |
| prSJS<br>1145 | AACAATTATCATTTTTTCATTGAGGTCTTATCCGTACGG<br>AAGTTCCTATTCTCTAGAAAGTATAGGAACTTCGGC<br>GAAAATGAGACGTTG | First forward primer PCR for<br><i>priCop</i> Cat <sup>R</sup> cassette                       |
| prSJS<br>1146 | GATGATTAATAATGATTTCGTTGCATATTGAGTGTTGTC<br>AGCTTACAGAGTGGCTACTTTAGCATAACAATTATC<br>ATTTTCATTGAGG   | Second forward primer PCR<br>for <i>priCop</i> Cat <sup>R</sup> cassette                      |
| prSJS<br>1147 | GGCGTCGTCGGTAATACCGGTAATACCACGCCAGC<br>GTACCCAGCACTACCGCCAGCCAGCCAATGATGATT<br>AAAATGATTTCGTTGC    | Third forward primer PCR for<br><i>priCop</i> Cat <sup>R</sup> cassette                       |
| prSJS<br>1243 | GCCTGAATCAGAAGTAATTGCTCGCCCGCCATCCTG<br>CGGGCGGCACAGCATTAAACGAGGTACACCCGTACGG<br>AAGTTCCTATTCTCTAG | Forward primer for <i>radAop</i>                                                              |
| prSJS<br>1244 | CCTGCCAGCGCGGATAATCGGCCCCGCATTTCATTAC<br>AAACAAAGGCGCGTTTTGGAGCTTTTGCCATTTTCTT<br>CCTCCTTCATGCCGGG | Reverse primer for <i>radAop</i>                                                              |

**Construction of the *radA* overproducer.** The *radA* overproducer mutation was made from a *priC* overproducer mutation (*priCop*). The original construction for *priCop* used four sets of PCR reactions. Each one adding sequences to the *cat* gene from pACYC184.

5 They add sequences for the *FRT* sites, the *recA* promoter (*recAo1401* and *recAo281*) and RBS sequences as well as the region of homolog before and after the *priC* start codon. The first PCR reaction used prSJS1049 and prSJS1050 (Table S1) and pACYC184 as a template to create a DNA fragment with the *cat* gene flanked by Flip (*FRT*) sites. Then using this PCR fragment just generated as the template, PCR was done using primers

10 prSJS1049 and prSJS1119. This step added an arbitrary sequence after the *FRT* site that allowed for more specific amplification in subsequent steps. Then using the DNA fragment just generated as the template, PCR was done again with prSJS1145 and prSJS1137 to generate a fragment of DNA where sequences upstream of the *priC* gene were added on the upstream side of the *FRT-cat-FRT* fragment and the arbitrary

15 sequence and part of the *recA* promoter were added on downstream side. This fragment was then used as the template in a PCR reaction with prSJS1146 and prSJS1143 to generate a fragment of DNA where more upstream *priC* sequences and the remainder of the *recA* promoter, RBS, ATG and *priC* coding sequences were added. It should be noted that the *recA* promoter had *recAo1401* and *recAo281* mutations that eliminated SOS

20 regulation (6, 7, 8) and the RBS was modified from the wild type to one that had been optimized. This fragment was then used in a final PCR reaction with prSJS1147 and prSJS1144 that further added regions of *priC* sequences upstream and downstream of the ATP. This fragment was then recombined onto the chromosome inserting the *FRT-cat-FRT-recAp-RBS* in front of the *priC* start codon by standard methods. The *priC* start

codon was also changed from a GTG to an ATG in the process.

**Construction of the *radA* overproducer mutation.** This sequence of DNA was constructed by using prSJS1243 and prSJS1244 with the strain that contained the *priCop* construction described above as a template in a PCR reaction. This fragment was then  
5 used to transform a recipient cell expressing the *exo*, *bet* and *gam* proteins (2). Chloramphenicol resistant recombinants were selected. One was selected and sequenced and named SS8245 (Table S1). This construct was confirmed by DNA sequencing.

1. **Baba, T., T. Ara, M. Hasegawa, Y. Takai, Y. Okumura, M. Baba, K. A. Datsenko, M. Tomita, B. L. Wanner, and H. Mori.** 2006. Construction of *Escherichia coli* K-12 in-frame, single-gene knockout mutants: the Keio collection. *Mol Syst Biol.* **2**:2006 0008.
2. **Datsenko, K. A., and B. L. Wanner.** 2000. One-step inactivation of chromosomal genes in *Escherichia coli* K-12 using PCR products. *Proc Natl Acad Sci U S A.* **97**:6640-5.
3. **Galletto, R., I. Amitani, R. J. Baskin, and S. C. Kowalczykowski.** 2006. Direct observation of individual RecA filaments assembling on single DNA molecules. *Nature.* **443**:875-8.
4. **Huang, L. C., E. A. Wood, and M. M. Cox.** 1997. Convenient and reversible site-specific targeting of exogenous DNA into a bacterial chromosome by use of the FLP recombinase: the FLIRT system. *J Bacteriol.* **179**:6076-83.
5. **Konrad, E. B.** 1977. Method for the isolation of *Escherichia coli* mutants with enhanced recombination between chromosomal duplications. *J Bacteriol.* **130**:167-72.
6. **Long, J. E., S. C. Massoni, and S. J. Sandler.** 2010. RecA4142 causes SOS constitutive expression by loading onto reversed replication forks in *Escherichia coli* K-12. *J Bacteriol.* **192**:2575-82.
7. **Long, J. E., N. Renzette, R. C. Centore, and S. J. Sandler.** 2008. Differential requirements of two *recA* mutants for constitutive SOS expression in *Escherichia coli* K-12. *PLoS One.* **3**:e4100.
8. **McCool, J. D., E. Long, J. F. Petrosino, H. A. Sandler, S. M. Rosenberg, and S. J. Sandler.** 2004. Measurement of SOS expression in individual *Escherichia coli* K-12 cells using fluorescence microscopy. *Mol Microbiol.* **53**:1343-57.
9. **Renzette, N., N. Gumlaw, J. T. Nordman, M. Krieger, S. P. Yeh, E. Long, R. Centore, R. Boonsombat, and S. J. Sandler.** 2005. Localization of RecA in *Escherichia coli* K-12 using RecA-GFP. *Mol Microbiol.* **57**:1074-85.
10. **Renzette, N., N. Gumlaw, and S. J. Sandler.** 2007. DinI and RecX modulate RecA-DNA structures in *Escherichia coli* K-12. *Mol Microbiol.* **63**:103-115.
11. **SaiSree, L., M. Reddy, and J. Gowrishankar.** 2000. *lon* incompatibility associated with mutations causing SOS induction: null *uvrD* alleles induce an SOS response in *Escherichia coli*. *J Bacteriol.* **182**:3151-7.
12. **Uhlen, B. E., M. R. Volkert, A. J. Clark, A. Sancar, and W. D. Rupp.** 1982. Nucleotide sequence of a *recA* operator mutation. LexA/operator-repressor binding/inducible repair. *Mol Gen Genet.* **185**:251-4.
13. **Volkert, M. R., L. J. Margossian, and A. J. Clark.** 1981. Evidence that *rnmB* is the operator of the *Escherichia coli* *recA* gene. *Proc Natl Acad Sci U S A.* **78**:1786-90.
14. **Wertman, K. F., and D. W. Mount.** 1985. Nucleotide sequence binding specificity of the LexA repressor of *Escherichia coli* K-12. *J Bacteriol.* **163**:376-84.
15. **Zieg, J., and S. R. Kushner.** 1977. Analysis of genetic recombination between two partially deleted lactose operons of *Escherichia coli* K-12. *J Bacteriol.*

**131:123-32.**
